# Supplementary material for: Comparison of Self-Reported Telephone Interviewing and Web-Based Survey Responses: Findings From the Second Australian Young and Well National Survey
Source: PubMed Central journal article supplement (PMC5635234; doi:10.2196/mental.8222), 2017-09-26
Supplement: mental_v4i3e37_app1.pdf [file mental_v4i3e37_app1.pdf]

Multimedia Appendix 1.

Mean rank differences between identical items administered using CATI and web-based self-report survey

| Survey item                                                                     | CATI item endorsement (% <sup>a</sup> ) | Online self-report survey item endorsement (% <sup>a</sup> ) | Wilcoxon signed-rank test ranking | n   | z     | P    |
|---------------------------------------------------------------------------------|-----------------------------------------|--------------------------------------------------------------|-----------------------------------|-----|-------|------|
| <b>1. Sex (female)</b>                                                          | 6                                       | 6                                                            |                                   |     |       |      |
|                                                                                 |                                         |                                                              | Negative Ranks                    | 0   | .00   | 1.00 |
|                                                                                 |                                         |                                                              | Positive Ranks                    | 0   |       |      |
|                                                                                 |                                         |                                                              | Ties                              | 101 |       |      |
| <b>2. Age<sup>b</sup></b>                                                       | 2 (3)                                   | 2 (3)                                                        |                                   |     |       |      |
|                                                                                 |                                         |                                                              | Negative Ranks                    | 0   | .00   | 1.00 |
|                                                                                 |                                         |                                                              | Positive Ranks                    | 0   |       |      |
|                                                                                 |                                         |                                                              | Ties                              | 101 |       |      |
| <b>3. Main educational/vocational activity (NEET)</b>                           | 5                                       | 18                                                           |                                   |     |       |      |
|                                                                                 |                                         |                                                              | Negative Ranks                    | 15  | -3.15 | .002 |
|                                                                                 |                                         |                                                              | Positive Ranks                    | 2   |       |      |
|                                                                                 |                                         |                                                              | Ties                              | 84  |       |      |
| <b>4. Highest level of education (tertiary)</b>                                 | 54                                      | 52                                                           |                                   |     |       |      |
|                                                                                 |                                         |                                                              | Negative Ranks                    | 6   | -.63  | .53  |
|                                                                                 |                                         |                                                              | Positive Ranks                    | 4   |       |      |
|                                                                                 |                                         |                                                              | Ties                              | 91  |       |      |
| <b>5. How would you rate your overall mental health in the past four weeks?</b> |                                         |                                                              |                                   |     |       |      |
| <i>very good</i>                                                                | 66                                      | 24                                                           |                                   |     |       |      |
| <i>good</i>                                                                     | 38                                      | 40                                                           |                                   |     |       |      |
| <i>moderate</i>                                                                 | 27                                      | 27                                                           |                                   |     |       |      |
| <i>bad</i>                                                                      | 4                                       | 8                                                            |                                   |     |       |      |
| <i>very bad</i>                                                                 | 3                                       | 2                                                            |                                   |     |       |      |
|                                                                                 |                                         |                                                              | Negative Ranks                    | 12  | -1.40 | .15  |
|                                                                                 |                                         |                                                              | Positive Ranks                    | 25  |       |      |
|                                                                                 |                                         |                                                              | Ties                              | 64  |       |      |
| <b>6. Have you ever been diagnosed with</b>                                     | 25                                      | 32                                                           |                                   |     |       |      |

|                                                                                                                                                   |    |    |                |    |       |      |
|---------------------------------------------------------------------------------------------------------------------------------------------------|----|----|----------------|----|-------|------|
| <b>a mental health or behavioural problem? (yes)</b>                                                                                              |    |    |                |    |       |      |
|                                                                                                                                                   |    |    | Negative Ranks | 1  | -2.12 | .03  |
|                                                                                                                                                   |    |    | Positive Ranks | 7  |       |      |
|                                                                                                                                                   |    |    | Ties           | 89 |       |      |
| <b>7i. In the past 12 months have you ever felt that life is hardly worth living? (yes)</b>                                                       | 23 | 27 |                |    |       |      |
|                                                                                                                                                   |    |    | Negative Ranks | 3  | -1.27 | .21  |
|                                                                                                                                                   |    |    | Positive Ranks | 7  |       |      |
|                                                                                                                                                   |    |    | Ties           | 85 |       |      |
| <b>7ii. In the past 12 months have you ever thought about taking your own life? (yes)</b>                                                         | 11 | 18 |                |    |       |      |
|                                                                                                                                                   |    |    | Negative Ranks | 1  | -2.33 | .02  |
|                                                                                                                                                   |    |    | Positive Ranks | 8  |       |      |
|                                                                                                                                                   |    |    | Ties           | 88 |       |      |
| <b>8. How long do you think a mental health or behavioural problem needs to be present before a young person should seek help? (&lt; 4 weeks)</b> | 66 | 72 |                |    |       |      |
|                                                                                                                                                   |    |    | Negative Ranks | 22 | -2.97 | .003 |
|                                                                                                                                                   |    |    | Positive Ranks | 7  |       |      |
|                                                                                                                                                   |    |    | Ties           | 71 |       |      |
| <b>9. Would you know where to get help if you, or someone you knew, was feeling suicidal? (agree/strongly agree)</b>                              | 83 | 81 |                |    |       |      |
|                                                                                                                                                   |    |    | Negative Ranks | 21 | -1.62 | .10  |
|                                                                                                                                                   |    |    | Positive Ranks | 12 |       |      |
|                                                                                                                                                   |    |    | Ties           | 65 |       |      |
| <b>1. Do you use the internet? (yes)</b>                                                                                                          | 10 | 10 |                |    |       |      |

|                                                                                                                             |    |    |                |     |       |      |
|-----------------------------------------------------------------------------------------------------------------------------|----|----|----------------|-----|-------|------|
|                                                                                                                             |    |    | Negative Ranks | 0   | .00   | 1.00 |
|                                                                                                                             |    |    | Positive Ranks | 0   |       |      |
|                                                                                                                             |    |    | Ties           | 101 |       |      |
| <b>11. How often do you use the Internet? (everyday/ almost everyday)</b>                                                   | 10 | 10 |                |     |       |      |
|                                                                                                                             |    |    | Negative Ranks | 0   | .00   | 1.00 |
|                                                                                                                             |    |    | Positive Ranks | 0   |       |      |
|                                                                                                                             |    |    | Ties           | 101 |       |      |
| <b>12. When are you most active online on a normal weekday/ workday? (regular daytime/ evening use)</b>                     | 97 | 97 |                |     |       |      |
|                                                                                                                             |    |    | Negative Ranks | 1   | .00   | 1.00 |
|                                                                                                                             |    |    | Positive Ranks | 1   |       |      |
|                                                                                                                             |    |    | Ties           | 96  |       |      |
| <b>13. When are you most active online on a normal weekend/ non-workday? (regular daytime/ evening use)</b>                 | 97 | 95 |                |     |       |      |
|                                                                                                                             |    |    | Negative Ranks | 1   | -1.00 | .32  |
|                                                                                                                             |    |    | Positive Ranks | 3   |       |      |
|                                                                                                                             |    |    | Ties           | 93  |       |      |
| <b>14. Have you ever used the internet to find information for a mental health, alcohol or substance use problem? (yes)</b> | 61 | 74 |                |     |       |      |
|                                                                                                                             |    |    | Negative Ranks | 2   | -3.15 | .002 |
|                                                                                                                             |    |    | Positive Ranks | 15  |       |      |
|                                                                                                                             |    |    | Ties           | 84  |       |      |
| <b>15. Do you think cyber-bullying is a serious problem for young people? (yes)</b>                                         | 93 | 81 |                |     |       |      |
|                                                                                                                             |    |    | Negative Ranks | 11  | -2.32 | .02  |
|                                                                                                                             |    |    | Positive Ranks | 0   |       |      |
|                                                                                                                             |    |    | Ties           | 86  |       |      |

|                                                                                                                             |    |    |                |    |       |     |
|-----------------------------------------------------------------------------------------------------------------------------|----|----|----------------|----|-------|-----|
| <b>16i. In the past 12-months, how often have you been cyber-bullied? (not bullied)</b>                                     | 81 | 82 |                |    |       |     |
|                                                                                                                             |    |    | Negative Ranks | 10 | -.94  | .35 |
|                                                                                                                             |    |    | Positive Ranks | 5  |       |     |
|                                                                                                                             |    |    | Ties           | 86 |       |     |
| <b>16ii. In the past 12 months, how often have you cyber-bullied someone? (never bullied)</b>                               | 83 | 87 |                |    |       |     |
|                                                                                                                             |    |    | Negative Ranks | 10 | -1.41 | .16 |
|                                                                                                                             |    |    | Positive Ranks | 5  |       |     |
|                                                                                                                             |    |    | Ties           | 84 |       |     |
| <b>17. Do you think sexting is a serious problem for young people your age? (yes)</b>                                       | 63 | 57 |                |    |       |     |
|                                                                                                                             |    |    | Negative Ranks | 7  | -1.67 | .10 |
|                                                                                                                             |    |    | Positive Ranks | 2  |       |     |
|                                                                                                                             |    |    | Ties           | 86 |       |     |
| <b>18. In the past 12 months, have you had any of these things happen to on your mobile, smart phone or the Internet...</b> |    |    |                |    |       |     |
| <i>i. You have been sent a sexual message (yes)</i>                                                                         | 46 | 51 |                |    |       |     |
|                                                                                                                             |    |    | Negative Ranks | 3  | -1.70 | .08 |
|                                                                                                                             |    |    | Positive Ranks | 9  |       |     |
|                                                                                                                             |    |    | Ties           | 89 |       |     |
| <i>ii. You have seen a sexual message posted where other people could see it (yes)</i>                                      | 30 | 27 |                |    |       |     |
|                                                                                                                             |    |    | Negative Ranks | 11 | -.69  | .49 |
|                                                                                                                             |    |    | Positive Ranks | 8  |       |     |
|                                                                                                                             |    |    | Ties           | 82 |       |     |
| <i>iii. You have been asked to talk about</i>                                                                               | 35 | 36 |                |    |       |     |

|                                                                                                             |    |    |                |     |       |      |
|-------------------------------------------------------------------------------------------------------------|----|----|----------------|-----|-------|------|
| <i>acts of a sexual nature with someone (yes)</i>                                                           |    |    |                |     |       |      |
|                                                                                                             |    |    | Negative Ranks | 9   | -.23  | .82  |
|                                                                                                             |    |    | Positive Ranks | 10  |       |      |
|                                                                                                             |    |    | Ties           | 82  |       |      |
| <i>iv. You have been asked for a photo or video clip showing yourself nude or nearly nude (yes)</i>         | 22 | 29 |                |     |       |      |
|                                                                                                             |    |    | Negative Ranks | 2   | -2.11 | .04  |
|                                                                                                             |    |    | Positive Ranks | 9   |       |      |
|                                                                                                             |    |    | Ties           | 90  |       |      |
| <i>v. You have seen other people perform acts of a sexual nature (yes)</i>                                  | 24 | 35 |                |     |       |      |
|                                                                                                             |    |    | Negative Ranks | 4   | -2.52 | .01  |
|                                                                                                             |    |    | Positive Ranks | 15  |       |      |
|                                                                                                             |    |    | Ties           | 82  |       |      |
| <i>vi. None (yes)</i>                                                                                       | 28 | 32 |                |     |       |      |
|                                                                                                             |    |    | Negative Ranks | 4   | -1.16 | .25  |
|                                                                                                             |    |    | Positive Ranks | 8   |       |      |
|                                                                                                             |    |    | Ties           | 89  |       |      |
| <i>vii. Don't know (yes)</i>                                                                                | 0  | 2  |                |     |       |      |
|                                                                                                             |    |    | Negative Ranks | 0   | -1.41 | .16  |
|                                                                                                             |    |    | Positive Ranks | 2   |       |      |
|                                                                                                             |    |    | Ties           | 99  |       |      |
| <i>viii. I would prefer not to respond (yes)</i>                                                            | 0  | 1  |                |     |       |      |
|                                                                                                             |    |    | Negative Ranks | 0   | -1.00 | .32  |
|                                                                                                             |    |    | Positive Ranks | 1   |       |      |
|                                                                                                             |    |    | Ties           | 100 |       |      |
| <b>19. In the past 12 months, have you done these things on your mobile, smart phone or the Internet...</b> |    |    |                |     |       |      |
| <i>i. Sent someone a sexual message (yes)</i>                                                               | 30 | 41 |                |     |       |      |
|                                                                                                             |    |    | Negative Ranks | 0   | -3.32 | .001 |
|                                                                                                             |    |    | Positive Ranks | 11  |       |      |
|                                                                                                             |    |    | Ties           | 90  |       |      |
| <i>ii. Posted a sexual message where other</i>                                                              | 1  | 5  |                |     |       |      |

|                                                                                                         |    |    |                |    |       |     |
|---------------------------------------------------------------------------------------------------------|----|----|----------------|----|-------|-----|
| <i>people could see it (yes)</i>                                                                        |    |    |                |    |       |     |
|                                                                                                         |    |    | Negative Ranks | 0  | -2.00 | .05 |
|                                                                                                         |    |    | Positive Ranks | 4  |       |     |
|                                                                                                         |    |    | Ties           | 97 |       |     |
| <i>iii. Talked about acts of a sexual nature with someone (yes)</i>                                     | 33 | 42 |                |    |       |     |
|                                                                                                         |    |    | Negative Ranks | 5  | -2.07 | .04 |
|                                                                                                         |    |    | Positive Ranks | 14 |       |     |
|                                                                                                         |    |    | Ties           | 82 |       |     |
| <i>iv. Asked someone to send you a photo or video clip showing themselves nude or nearly nude (yes)</i> | 9  | 13 |                |    |       |     |
|                                                                                                         |    |    | Negative Ranks | 2  | -1.41 | .16 |
|                                                                                                         |    |    | Positive Ranks | 6  |       |     |
|                                                                                                         |    |    | Ties           | 93 |       |     |
| <i>v. Sent someone a photo or video of yourself nude or nearly nude (yes)</i>                           | 15 | 23 |                |    |       |     |
|                                                                                                         |    |    | Negative Ranks | 3  | -2.14 | .03 |
|                                                                                                         |    |    | Positive Ranks | 11 |       |     |
|                                                                                                         |    |    | Ties           | 87 |       |     |
| <i>vi. None (yes)</i>                                                                                   | 51 | 48 |                |    |       |     |
|                                                                                                         |    |    | Negative Ranks | 8  | -.83  | .41 |
|                                                                                                         |    |    | Positive Ranks | 5  |       |     |
|                                                                                                         |    |    | Ties           | 88 |       |     |
| <i>vii. Don't know (yes)</i>                                                                            | 0  | 2  |                |    |       |     |
|                                                                                                         |    |    | Negative Ranks | 0  | -1.41 | .16 |
|                                                                                                         |    |    | Positive Ranks | 2  |       |     |
|                                                                                                         |    |    | Ties           | 99 |       |     |
| <i>viii. I would prefer not to respond (yes)</i>                                                        | 0  | 2  |                |    |       |     |
|                                                                                                         |    |    | Negative Ranks | 0  | -1.41 | .16 |
|                                                                                                         |    |    | Positive Ranks | 2  |       |     |
|                                                                                                         |    |    | Ties           | 99 |       |     |
| <b>2. Do any of the following issues concern you personally...</b>                                      |    |    |                |    |       |     |
| <i>i. Alcohol (yes)</i>                                                                                 | 19 | 17 |                |    |       |     |

|                                               |    |    |                |    |       |       |
|-----------------------------------------------|----|----|----------------|----|-------|-------|
|                                               |    |    | Negative Ranks | 9  | -.50  | .62   |
|                                               |    |    | Positive Ranks | 7  |       |       |
|                                               |    |    | Ties           | 82 |       |       |
| <i>ii. Body Image (yes)</i>                   | 35 | 65 |                |    |       |       |
|                                               |    |    | Negative Ranks | 3  | -4.27 | <.001 |
|                                               |    |    | Positive Ranks | 26 |       |       |
|                                               |    |    | Ties           | 68 |       |       |
| <i>iii. Bullying or emotional abuse (yes)</i> | 26 | 27 |                |    |       |       |
|                                               |    |    | Negative Ranks | 10 | -.22  | .83   |
|                                               |    |    | Positive Ranks | 11 |       |       |
|                                               |    |    | Ties           | 77 |       |       |
| <i>iv. Coping with stress (yes)</i>           | 65 | 68 |                |    |       |       |
|                                               |    |    | Negative Ranks | 11 | -.96  | .34   |
|                                               |    |    | Positive Ranks | 16 |       |       |
|                                               |    |    | Ties           | 70 |       |       |
| <i>v. Depression (yes)</i>                    | 37 | 44 |                |    |       |       |
|                                               |    |    | Negative Ranks | 7  | -1.50 | .13   |
|                                               |    |    | Positive Ranks | 14 |       |       |
|                                               |    |    | Ties           | 76 |       |       |
| <i>vi. Drugs (yes)</i>                        | 2  | 1  |                |    |       |       |
|                                               |    |    | Negative Ranks | 5  | .33   | .74   |
|                                               |    |    | Positive Ranks | 4  |       |       |
|                                               |    |    | Ties           | 90 |       |       |
| <i>vii. Self-harm (yes)</i>                   | 11 | 12 |                |    |       |       |
|                                               |    |    | Negative Ranks | 3  | -.71  | .48   |
|                                               |    |    | Positive Ranks | 5  |       |       |
|                                               |    |    | Ties           | 89 |       |       |

- a. unless otherwise stated
- b. mean age (standard deviation)
