# Supplementary material for: Comparison of Self-Reported Telephone Interviewing and Web-Based Survey Responses: Findings From the Second Australian Young and Well National Survey
Source: PubMed Central journal article supplement (PMC5635234; doi:10.2196/mental.8222), 2017-09-26
Supplement: mental_v4i3e37_app2.pdf [file mental_v4i3e37_app2.pdf]

Multimedia Appendix 2.

*Second Australian Young and Well National Survey 2014 results and sub-study results*

| Questionnaire item                                                                                                                                | National Survey 2014               |                                    | Substudy 2014                      |                                    |
|---------------------------------------------------------------------------------------------------------------------------------------------------|------------------------------------|------------------------------------|------------------------------------|------------------------------------|
|                                                                                                                                                   | CATI                               | Online                             | CATI                               | Online                             |
|                                                                                                                                                   | Item endorsement (% <sup>a</sup> ) | Item endorsement (% <sup>a</sup> ) | Item endorsement (% <sup>a</sup> ) | Item endorsement (% <sup>a</sup> ) |
| N                                                                                                                                                 | 1400                               | 1496                               | 101                                | 101                                |
| <b>1. Sex (female)</b>                                                                                                                            | 49.6                               | 63.9                               | 60.4                               | 60.4                               |
| <b>2. Age<sup>b</sup></b>                                                                                                                         | 20.2 (2.7)                         | 19.1 (3.0)                         | 20.2 (2.9)                         | 20.2 (2.9)                         |
| <b>3. EET (yes)</b>                                                                                                                               | 92.0                               | 90.1                               | 95.0                               | 82.2                               |
| <b>4. Highest level of education (tertiary)</b>                                                                                                   | 48.3                               | 35.8                               | 53.5                               | 51.5                               |
| <b>5. How would you rate your overall mental health in the past four weeks?</b>                                                                   |                                    |                                    |                                    |                                    |
| <i>very good</i>                                                                                                                                  | 31.4                               | 17.8                               | 28.7                               | 23.8                               |
| <i>good</i>                                                                                                                                       | 39.5                               | 28.5                               | 37.6                               | 39.6                               |
| <i>moderate</i>                                                                                                                                   | 21.7                               | 32.4                               | 26.7                               | 26.7                               |
| <i>bad</i>                                                                                                                                        | 6.2                                | 16.1                               | 4.0                                | 7.9                                |
| <i>very bad</i>                                                                                                                                   | 1.2                                | 5.3                                | 3.0                                | 2.0                                |
| <b>6. Have you ever been diagnosed with a mental health or behavioural problem? (yes)</b>                                                         | 23.9                               | 31.6                               | 25.0                               | 31.6                               |
| <b>7i. In the past 12 months have you ever felt that life is hardly worth living? (yes)</b>                                                       | 21.3                               | 43.9                               | 23.0                               | 27.4                               |
| <b>7ii. In the past 12 months have you ever thought about taking your own life? (yes)</b>                                                         | 15.4                               | 33.5                               | 11.1                               | 18.4                               |
| <b>8. How long do you think a mental health or behavioural problem needs to be present before a young person should seek help? (&lt; 4 weeks)</b> | 70.5                               | 63.0                               | 66.3                               | 72.0                               |
| <b>9. Would you know where to get help if you, or someone you knew, was feeling suicidal? (agree/ strongly agree)</b>                             | 62.9                               | 67.3                               | 82.0                               | 80.8                               |

|                                                                                                                             |       |      |       |       |
|-----------------------------------------------------------------------------------------------------------------------------|-------|------|-------|-------|
| <b>1. Do you use the internet? (yes)</b>                                                                                    | 100.0 | 98.9 | 100.0 | 100.0 |
| <b>11. How often do you use the Internet? (everyday/ almost everyday)</b>                                                   | 99.2  | 99.4 | 100.0 | 100.0 |
| <b>12. When are you most active online on a normal weekday/ workday? (regular daytime/ evening use)</b>                     | 94.9  | 96.0 | 97.0  | 97.0  |
| <b>13. When are you most active online on a normal weekend/ non-workday? (regular daytime/ evening use)</b>                 | 94.8  | 93.6 | 97.0  | 94.9  |
| <b>14. Have you ever used the internet to find information for a mental health, alcohol or substance use problem? (yes)</b> | 50.5  | 71.9 | 61.4  | 74.3  |
| <b>15. Do you think cyberbullying is a serious problem for young people? (yes)</b>                                          | 94.8  | 73.9 | 93.1  | 80.6  |
| <b>16i. In the past 12-months, how often have you been cyberbullied? (not bullied)</b>                                      | 83.6  | 74.2 | 81.2  | 82.2  |
| <b>16ii. In the past 12 months, how often have you cyberbullied someone? (never bullied)</b>                                | 82.0  | 81.7 | 83.2  | 86.9  |
| <b>17. Do you think sexting is a serious problem for young people your age? (yes)</b>                                       | 55.8  | 54.7 | 62.8  | 57.1  |
| <b>18. In the past 12 months, have you had any of these things happen to on your mobile, smart phone or the Internet...</b> |       |      |       |       |
| <i>i. You have been sent a sexual message (yes)</i>                                                                         | 46.0  | 19.7 | 45.5  | 51.5  |
| <i>ii. You have seen a sexual message posted where other people could see it (yes)</i>                                      | 42.7  | 10.8 | 29.7  | 26.7  |
| <i>iii. You have been asked to talk about acts of a sexual nature with someone (yes)</i>                                    | 34.9  | 13.3 | 34.7  | 35.6  |
| <i>iv. You have been asked for a photo or video clip showing yourself nude or nearly nude (yes)</i>                         | 31.1  | 12.8 | 21.8  | 28.7  |
| <i>v. You have seen other people perform acts of a sexual nature (yes)</i>                                                  | 38.6  | 11.8 | 23.8  | 34.7  |
| <i>vi. None (yes)</i>                                                                                                       | 26.9  | 16.6 | 27.7  | 31.7  |

|                                                                                                             |      |      |      |      |
|-------------------------------------------------------------------------------------------------------------|------|------|------|------|
| <i>vii. Don't know (yes)</i>                                                                                | .0   | .8   | .0   | 2.0  |
| <i>viii. I would prefer not to respond (yes)</i>                                                            | .3   | 1.6  | .0   | 1.0  |
| <b>19. In the past 12 months, have you done these things on your mobile, smart phone or the Internet...</b> |      |      |      |      |
| <i>i. Sent someone a sexual message (yes)</i>                                                               | 32.1 | 14.8 | 29.9 | 40.6 |
| <i>ii. Posted a sexual message where other people could see it (yes)</i>                                    | 1.7  | 1.3  | 1.0  | 5.0  |
| <i>iii. Talked about acts of a sexual nature with someone (yes)</i>                                         | 36.6 | 14.6 | 32.7 | 41.6 |
| <i>iv. Asked someone to send you a photo or video clip showing themselves nude or nearly nude (yes)</i>     | 12.1 | 4.8  | 8.9  | 12.9 |
| <i>v. Sent someone a photo or video of yourself nude or nearly nude (yes)</i>                               | 16.9 | 9.5  | 14.9 | 22.8 |
| <i>vi. None (yes)</i>                                                                                       | 56.4 | 24.3 | 50.5 | 47.8 |
| <i>vii. Don't know (yes)</i>                                                                                | .0   | .7   | .0   | 2.0  |
| <i>viii. I would prefer not to respond (yes)</i>                                                            | .6   | 1.7  | .0   | 2.0  |
| <b>2. Do any of the following issues concern you personally...</b>                                          |      |      |      |      |
| <i>i. Alcohol (yes)</i>                                                                                     | 18.9 | 14.6 | 19.0 | 17.2 |
| <i>ii. Body Image (yes)</i>                                                                                 | 47.7 | 74.8 | 34.7 | 65.3 |
| <i>iii. Bullying or emotional abuse (yes)</i>                                                               | 29.1 | 27.1 | 25.7 | 26.5 |
| <i>iv. Coping with stress (yes)</i>                                                                         | 65.0 | 81.5 | 65.0 | 68.4 |
| <i>v. Depression (yes)</i>                                                                                  | 35.7 | 54.8 | 37.0 | 43.9 |
| <i>vi. Drugs (yes)</i>                                                                                      | 16.2 | 10.9 | 10.9 | 10.1 |
| <i>vii. Self-harm (yes)</i>                                                                                 | 15.5 | 23.6 | 10.9 | 12.4 |

a. Unless otherwise stated

b. mean age (standard deviation)
